# Supplementary material
Source: PubMed Central journal article supplement (PMC5409868)
Supplement: NIHMS841775-supplement-01.pdf [file NIHMS841775-supplement-01.pdf]

**Supplementary Table.** Spearman correlation coefficients between food groups or computed nutrients and dietary energy density

| <b>Food Group or Nutrient</b> | <b>r</b> |
|-------------------------------|----------|
| Soups                         | -0.18    |
| Pastries                      | 0.37     |
| Condiments                    | 0.11     |
| Vegetables                    | -0.37    |
| Legumes                       | -0.14    |
| Fruits                        | -0.58    |
| Dairy                         | -0.01    |
| Nuts                          | 0.18     |
| Grains                        | 0.25     |
| Meat and Poultry              | 0.26     |
| Eggs                          | 0.30     |
| Total Protein                 | 0.17     |
| Animal Protein                | 0.22     |
| Vegetable Protein             | -0.02    |
| Carbohydrate                  | -0.02    |
| Fat                           | 0.61     |
| Saturated Fatty Acids         | 0.60     |
| Polyunsaturated Fatty Acids   | 0.53     |
| Monounsaturated Fatty Acids   | 0.61     |
| Alcohol                       | 0.39     |
| Added Sugars                  | 0.22     |

r = rho
